# Supplementary material for: Protein–saliva interactions: a systematic review
Source: Royal Society of Chemistry journal article supplement (doi:10.1039/d0fo03180a), 2021-01-01
Supplement: d0fo03180a1.pdf [file d0fo03180a1.pdf]

## Supplementary Information

### Protein-saliva interactions: a systematic review

*Frances Brown<sup>a</sup>, Alan R. Mackie<sup>a†</sup>, Qi He<sup>b</sup>, Alison Branch<sup>b</sup> and Anwesha Sarkar<sup>a\*</sup>*

<sup>a</sup> Food Colloids and Bioprocessing Group, School of Food Science and Nutrition, University of Leeds, Leeds, United Kingdom

<sup>b</sup> Mondelēz International, Reading, United Kingdom

Corresponding authors:

E-mail address: [A.Sarkar@leeds.ac.uk](mailto:A.Sarkar@leeds.ac.uk) (\*A. Sarkar). [A.R.Mackie@leeds.ac.uk](mailto:A.R.Mackie@leeds.ac.uk) (†A. R. Mackie).

**Supplementary Table S1.** Assessment of risk per included study.

| Reporting quality                       |                                            |                                                   | Only applicable if using human saliva   |                                     |                                |                                                                         |                                                       | Performance Bias                       |                          |                                                          | Selection bias                                           |                                                                                                   | Detection Bias                                                |                                                        | Total                                 |      |      |      |      |       |
|-----------------------------------------|--------------------------------------------|---------------------------------------------------|-----------------------------------------|-------------------------------------|--------------------------------|-------------------------------------------------------------------------|-------------------------------------------------------|----------------------------------------|--------------------------|----------------------------------------------------------|----------------------------------------------------------|---------------------------------------------------------------------------------------------------|---------------------------------------------------------------|--------------------------------------------------------|---------------------------------------|------|------|------|------|-------|
| Reference                               | Disclosed protein origin and type used (2) | Disclosed (Model) Saliva origin and type used (2) | Disclosed protein processing method (2) | Reported how many saliva donors (2) | Reported age range and sex (2) | Reported health status of donors (and how they were deemed healthy) (2) | Reported if saliva was stimulated or unstimulated (2) | Reported how saliva was stimulated (2) | Reported temperature (2) | Reported ratio of mixture between saliva and protein (2) | Reported the makes of apparatus used for methodology (2) | Kept the food system/delivery of the protein the same in all conditions except for 1 variable (2) | Blinded sensory panel to the true objectives of the study (2) | Used the same methods for the control and exposure (2) | Reported the number of replicates (2) | RQ   | PB   | SB   | DB   | Total |
| Ahmad, et al. (2020) <sup>44</sup>      | 2                                          | 2                                                 | NA                                      | NA                                  | NA                             | NA                                                                      | NA                                                    | NA                                     | 2                        | 2                                                        | 2                                                        | 2                                                                                                 | NA                                                            | 2                                                      | 2                                     | 100% | 100% | 100% | 100% | 100%  |
| Ahmad, et al. (2020) <sup>55</sup>      | 2                                          | 2                                                 | NA                                      | NA                                  | NA                             | NA                                                                      | NA                                                    | NA                                     | 1                        | 2                                                        | 2                                                        | 2                                                                                                 | NA                                                            | 2                                                      | 2                                     | 100% | 83%  | 100% | 100% | 96%   |
| Andrewes, et al. (2011) <sup>45</sup>   | 2                                          | 2                                                 | 2                                       | 2                                   | 0                              | 1                                                                       | 2                                                     | 2                                      | 0                        | 2                                                        | 2                                                        | 2                                                                                                 | NA                                                            | 2                                                      | 2                                     | 81%  | 67%  | 100% | 100% | 87%   |
| Beecher, et al. (2008) <sup>46</sup>    | 2                                          | NA                                                | 2                                       | 2                                   | 2                              | 1                                                                       | 0                                                     | 0                                      | 1                        | 2                                                        | 2                                                        | 2                                                                                                 | 2                                                             | 2                                                      | 0                                     | 64%  | 83%  | 100% | 50%  | 74%   |
| Biegler, et al. (2016) <sup>61</sup>    | 2                                          | 2                                                 | NA                                      | 2                                   | 1                              | 1                                                                       | 0                                                     | 0                                      | 1                        | 2                                                        | 2                                                        | 2                                                                                                 | 0                                                             | 2                                                      | 2                                     | 57%  | 83%  | 50%  | 100% | 73%   |
| Campbell, et al (2017) <sup>68</sup>    | 2                                          | NA                                                | 2                                       | 2                                   | 1                              | 2                                                                       | 0                                                     | 2                                      | 1                        | NA                                                       | 2                                                        | 0                                                                                                 | NA                                                            | 2                                                      | 2                                     | 79%  | 75%  | 0%   | 100% | 63%   |
| Çelebioğlu, et al. (2015) <sup>52</sup> | 2                                          | 2                                                 | 2                                       | NA                                  | NA                             | NA                                                                      | NA                                                    | NA                                     | 1                        | 2                                                        | 2                                                        | 2                                                                                                 | NA                                                            | 2                                                      | 2                                     | 100% | 83%  | 100% | 100% | 96%   |

|                                          |   |    |    |    |    |    |    |    |   |    |   |   |    |   |   |      |            |            |      |      |
|------------------------------------------|---|----|----|----|----|----|----|----|---|----|---|---|----|---|---|------|------------|------------|------|------|
| Çelebioğlu, et al. (2016) <sup>51</sup>  | 2 | 2  | NA | NA | NA | NA | NA | NA | 1 | 2  | 2 | 2 | NA | 2 | 2 | 100% | 83%        | 100%       | 100% | 96%  |
| Çelebioğlu, et al. (2017) <sup>53</sup>  | 2 | 2  | 2  | NA | NA | NA | NA | NA | 2 | 2  | 2 | 2 | NA | 2 | 0 | 100% | 100%       | 100%       | 50%  | 88%  |
| Childs, et al. (2010) <sup>65</sup>      | 0 | NA | 2  | 2  | 1  | 0  | NA | NA | 1 | NA | 2 | 0 | 2  | 2 | 2 | 50%  | 50%        | 50%        | 100% | 63%  |
| Dresselhuus, et al. (2008) <sup>73</sup> | 2 | NA | NA | 2  | 0  | 1  | 2  | NA | 0 | 2  | 2 | 2 | 2  | 2 | 2 | 70%  | 67%        | 100%       | 100% | 84%  |
| Fuhrman, et al. (2019) <sup>66</sup>     | 2 | NA | 2  | 2  | 0  | 0  | 0  | 0  | 2 | 2  | 2 | 0 | 2  | 2 | 2 | 43%  | 100%       | 50%        | 100% | 73%  |
| Hsein, et al. (2015) <sup>47</sup>       | 2 | 2  | 2  | NA | NA | NA | NA | NA | 1 | 2  | 2 | 2 | NA | 2 | 2 | 100% | 83%        | 100%       | 100% | 96%  |
| Hu, et al. (2019) <sup>72</sup>          | 2 | 0  | NA | 2  | 2  | 1  | NA | 2  | 1 | 2  | 2 | 0 | NA | 2 | 2 | 75%  | ####<br>## | ####<br>## | 100% | 90%  |
| Kelly, et al. (2010) <sup>48</sup>       | 2 | NA | 2  | 2  | 2  | 1  | 2  | 2  | 1 | 2  | 2 | 2 | 2  | 2 | 2 | 93%  | 83%        | 100%       | 100% | 94%  |
| Koukoura, et al. (2019) <sup>59</sup>    | 2 | 2  | NA | NA | NA | NA | NA | NA | 1 | 2  | 2 | 2 | NA | 2 | 2 | 100% | 83%        | 100%       | 100% | 96%  |
| Lee, et al. (2008) <sup>49</sup>         | 2 | NA | 2  | 2  | 1  | 0  | NA | NA | 1 | NA | 2 | 2 | 2  | 2 | 0 | 70%  | 75%        | 100%       | 50%  | 74%  |
| Morell, et al. (2015) <sup>64</sup>      | 2 | 2  | 2  | 2  | 2  | 0  | NA | NA | 2 | 2  | 2 | 2 | 2  | 2 | 2 | 83%  | 100%       | 100%       | 100% | 96%  |
| Morell, et al. (2017) <sup>63</sup>      | 2 | 2  | 2  | 2  | 0  | 1  | 2  | 2  | 2 | 2  | 2 | 2 | 2  | 2 | 2 | 81%  | 100%       | 100%       | 100% | 95%  |
| Ritzoulis, et al. (2012) <sup>58</sup>   | 2 | 2  | 2  | NA | NA | NA | NA | NA | 1 | 2  | 2 | 2 | NA | 2 | 2 | 100% | 50%        | 100%       | 100% | 88%  |
| Sano, et al. (2005) <sup>38</sup>        | 2 | NA | 2  | 2  | 2  | 1  | NA | NA | 0 | NA | 2 | 2 | 2  | 2 | 2 | 90%  | 50%        | 100%       | 100% | 85%  |
| Sarkar, et al. (2009) <sup>56</sup>      | 2 | 2  | 2  | NA | NA | NA | NA | NA | 2 | 2  | 2 | 2 | NA | 2 | 2 | 100% | 100%       | 100%       | 100% | 100% |
| Silletti, et al. (2010) <sup>41</sup>    | 2 | NA | 2  | 0  | 0  | 0  | 2  | 1  | 1 | 0  | 2 | 2 | NA | 2 | 0 | 50%  | 50%        | 100%       | 50%  | 63%  |

|                                             |   |    |   |    |    |    |    |    |   |    |   |   |    |   |   |       |       |       |       |     |
|---------------------------------------------|---|----|---|----|----|----|----|----|---|----|---|---|----|---|---|-------|-------|-------|-------|-----|
| Silletti, E., et al. (2007) <sup>1</sup>    | 2 | NA | 2 | 1  | 1  | 1  | 1  | 1  | 1 | 2  | 2 | 2 | NA | 2 | 2 | 64 %  | 83%   | 100 % | 100 % | 87% |
| Silletti, E., et al. (2007) <sup>60</sup>   | 2 | NA | 2 | 2  | 2  | 1  | 2  | 2  | 1 | 2  | 2 | 2 | NA | 2 | 2 | 93 %  | 83%   | 100 % | 100 % | 94% |
| Silletti, et al. (2008) <sup>57</sup>       | 2 | NA | 2 | NA | 0  | 2  | 2  | 2  | 1 | 2  | 2 | 0 | NA | 2 | 2 | 86 %  | 83%   | 0%    | 100 % | 67% |
| Vardhana bhuti, et al. (2010) <sup>54</sup> | 2 | NA | 2 | 2  | 2  | 0  | NA | NA | 1 | 2  | 2 | 2 | 2  | 2 | 2 | 80 %  | 83%   | 100 % | 100 % | 91% |
| Vardhana bhuti, et al. (2011) <sup>36</sup> | 2 | NA | 2 | 2  | 0  | 0  | 2  | 2  | 1 | 0  | 2 | 2 | 1  | 2 | 2 | 71 %  | 50%   | 75%   | 100 % | 74% |
| Vingerhods, et al. (2009) <sup>42</sup>     | 2 | NA | 2 | 0  | 0  | 0  | NA | NA | 1 | NA | 2 | 2 | 2  | 2 | 2 | 40 %  | 75%   | 100 % | 100 % | 79% |
| Vingerhods, et al. (2005) <sup>37</sup>     | 2 | 2  | 2 | 2  | 2  | 1  | 0  | 2  | 1 | 2  | 2 | 2 | NA | 2 | 0 | 81 %  | 83%   | 100 % | 50 %  | 79% |
| Wang, et al. (2016) <sup>50</sup>           | 0 | NA | 0 | 2  | 0  | 0  | NA | NA | 0 | NA | 2 | 0 | 1  | 2 | 2 | 20 %  | 50%   | 25%   | 100 % | 49% |
| Withers, et al. (2013) <sup>40</sup>        | 2 | 2  | 2 | NA | NA | NA | NA | NA | 1 | 2  | 2 | 2 | NA | 2 | 0 | 100 % | 83%   | 100 % | 50 %  | 83% |
| Ye, et al. (2011) <sup>43</sup>             | 2 | NA | 2 | 2  | 0  | 2  | 2  | 2  | 2 | 2  | 2 | 2 | 2  | 2 | 2 | 86 %  | 100 % | 100 % | 100 % | 96% |

Yes= 2, No= 0, Ambiguous/ indirect =1, NA did not count towards scores,

DB: Detection bias, PB: Performance Bias, RQ: Reporting quality ,SB: Selection Bias,
